# Supplementary material for: On the Use of Oxidation Induction Time as a Kinetic Parameter for Condition Monitoring and Lifetime Evaluation under Ionizing Radiation Environments
Source: Polymers (Basel). 2022 Jun 10;14(12):2357. doi: 10.3390/polym14122357 (PMC9229975; doi:10.3390/polym14122357)
Supplement: Supplementary file 1 [file polymers-14-02357-s001.zip › polymers-1737075-supplementary.pdf]

# Supplementary material

## On the use of oxidation induction time as a kinetic parameter for condition monitoring and lifetime evaluation under ionizing radiation environments

Eduard-Marius Lungulescu<sup>1,\*</sup>, Radu Setnescu<sup>1,2</sup>, Sorin Ilie<sup>3</sup>, Mauro Taborelli<sup>4</sup>,

<sup>1</sup>National Institute for Research and Development in Electrical Engineering ICPE-CA, 313, Splaiul Unirii, 030138 Bucharest, Romania; radu.setnescu@icpe-ca.ro (R.S.)

<sup>2</sup>Department of Advanced Technologies, Faculty of Sciences and Arts, Valahia University of Târgoviște, 13 Aleea Sinaia, 130004 Targoviste, Romania

<sup>3</sup>Former head of TS-MME/CCS in CERN; sorins712@gmail.com (S.I.)

<sup>4</sup>European Organization for Nuclear Research (CERN), 1211 Geneva 23, Switzerland; mauro.taborelli@cern.ch (M.T.)

\*Correspondence: marius.lungulescu@icpe-ca.ro (E.-M.L)

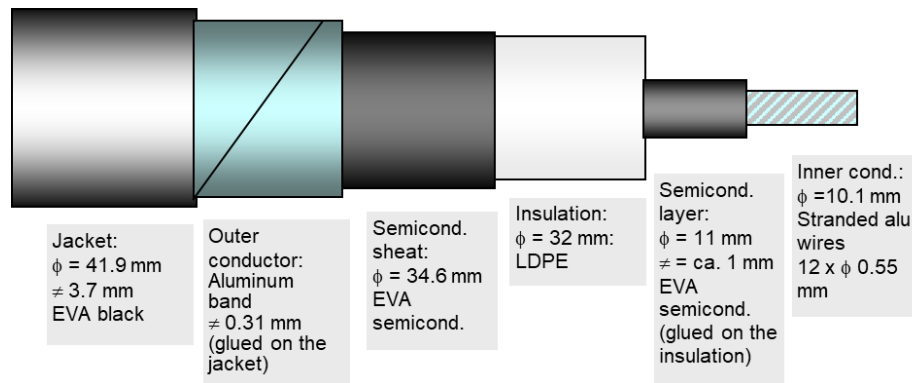

Figure S1. Structure of C1 cable [General purpose, High Voltage - HV- coaxial cable]

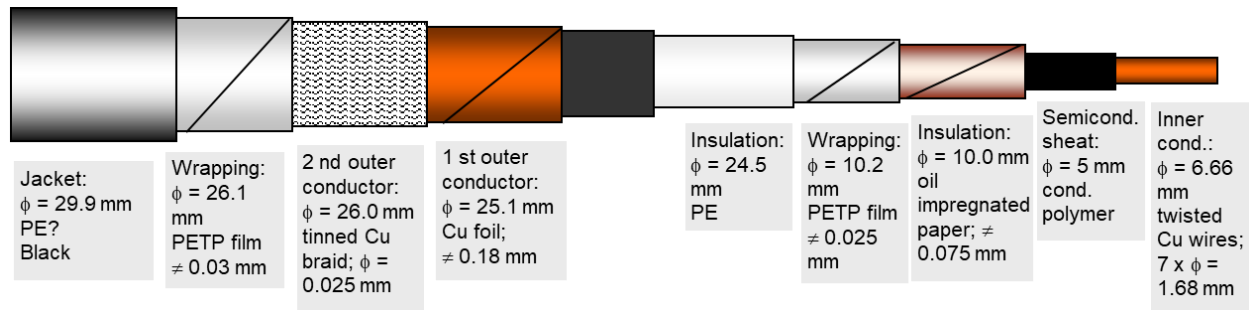

Figure S2. Structure of C4 cable (General purpose, HV/HF coaxial cable)

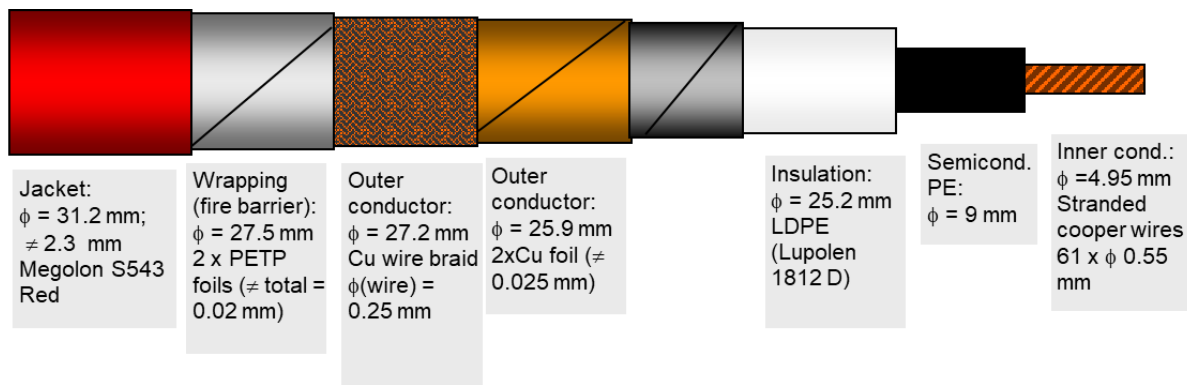

**Figure S3.** Structure of C3 cable (General purpose, HV/HF - High Frequencies - coaxial cable)

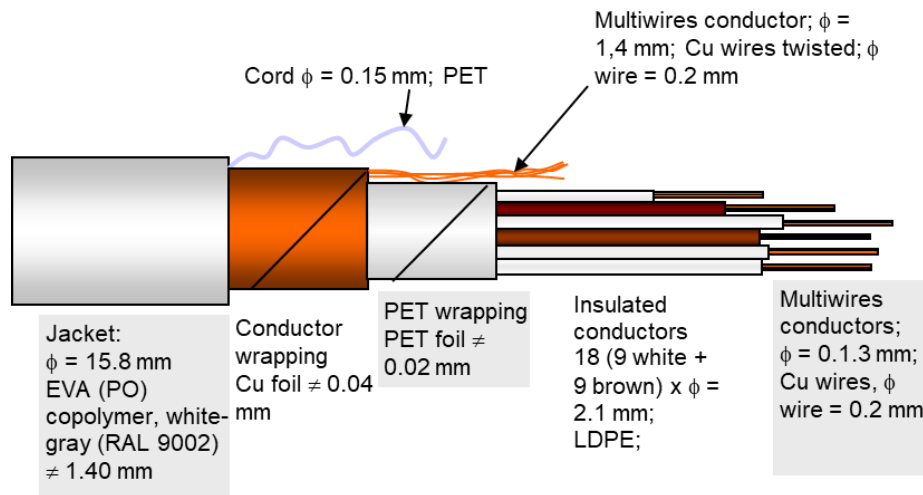

**Figure S4.** Structure of C9 cable (General purpose, I&C - Instrumentation and Control- cable)

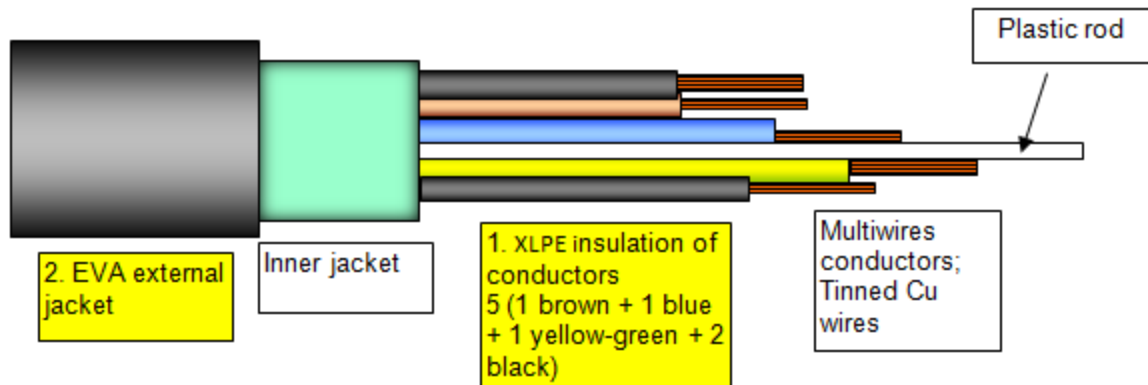

**Figure S5.** Structure of IC1 cable (General purpose, I&C - Instrumentation and Control- cable)

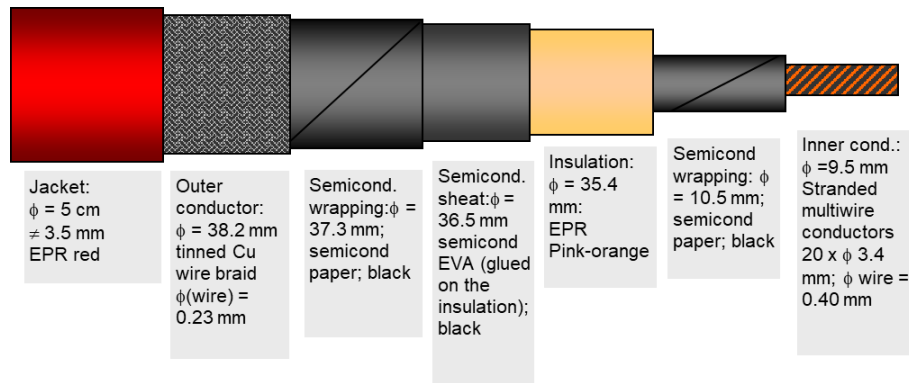

**Figure S6.** Structure of C2 cable (General purpose, HV, coaxial cable)

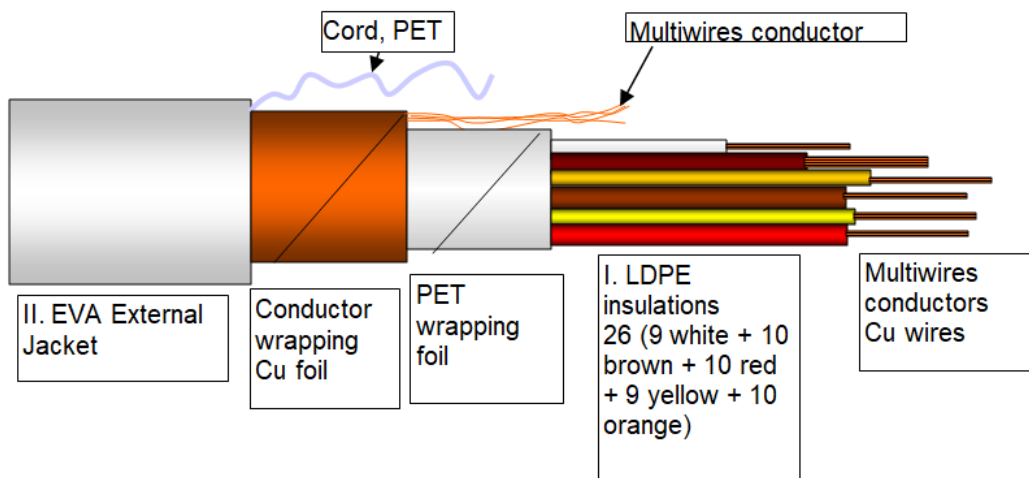

**Figure S7.** Structure of IC2 cable (General purpose, I&C - Instrumentation and Control- cable)
